# Supplementary material for: The heat shock response restricts virus infection in Drosophila
Source: PubMed Central journal article supplement (PMC4522674; doi:10.1038/srep12758), 2015-08-03
Supplement: srep12758-s1.pdf [file srep12758-s1.pdf]

## The heat shock response restricts virus infection in *Drosophila*

Sarah H. Merklings\*, Gijs J. Overheul\*, Joël T. van Mierlo\*, Daan Arends\*, Christian Gilissen†, Ronald P. van Rij\*

### Supplementary Figure legends

**Figure S1.** List of upregulated genes (> 2-fold over mock) in DCV-infected *Drosophila* S2 cells at (a) 8 hours and (b) 24 hpi. Probe set ID is the unique identifier given by Affymetrix to the probes on a microarray.

**Figure S2.** List of downregulated genes (>2-fold over mock) in DCV-infected *Drosophila* S2 cells at (a) 8 hours and (b) 24 hpi. (c) Gene ontology analysis of downregulated genes at 24 hpi. All significantly enriched level 4 GO terms are shown ( $P < 0.05$  in a hypergeometric test with Benjamini & Hochberg correction) No significant enrichment was found at 8 hpi.

**Figure S3.** List of genes that are (a) upregulated and (b) downregulated (>2-fold over mock) in wild-type flies at 24 hours after DCV infection. (c) Gene ontology analysis of downregulated genes. All significantly enriched level 4 GO terms are shown ( $P < 0.05$  in a hypergeometric test with Benjamini & Hochberg correction).

**Figure S4.** List of genes that are (a) upregulated and (b) downregulated (> 2-fold over mock) in wild-type flies at 24 hours after CrPV infection. (c) Gene ontology analysis of downregulated genes. All significantly enriched level 4 GO terms are shown ( $P < 0.05$  in a hypergeometric test with Benjamini & Hochberg correction).

**Figure S5.** Western blot analysis of Hsp70 proteins in DCV infected S2 cells at 16 and 24 hpi. An anti-Hsp70 monoclonal antibody was used to stain the inducible form of Hsp70. The asterisk indicates a nonspecific band and verifies equal loading of the gel. Molecular mass (kDa) is indicated on the left of the blot.

**Figure S6.** (a) *Hsf* expression in flies expressing an RNAi-inducing hairpin targeting *Hsf* (*UAS-Hsf<sup>RNAi</sup>*) under control of a fat body specific driver (*C564-Gal4*). Data are presented as percentage of *Hsf* expression in control flies expressing the fat body driver but not RNAi-inducing hairpin (*C564-Gal4*>+). A Student's t-test was used to compare the difference in expression (\* $P < 0.05$ ). (b) Firefly (FLuc) and Renilla (Ren) luminescence counts and (c) FLuc/Ren ratios in flies subjected to *in vivo* transfection with Firefly and Renilla reporter plasmids, together with a dsRNA targeting Firefly luciferase (dsFluc) or a nonspecific dsRNA (dsGFP). Data are means and s.d. of three independent pools of (a) 15 or of (b, c) 10 female flies for each genotype and condition.

## Supplementary Figure S1

### a. Up-regulated, 8 hpi

| Probeset ID  | Flybase ID  | Gene name                                        | Fold change |
|--------------|-------------|--------------------------------------------------|-------------|
| 1631628_s_at | FBgn0033520 | Peroxiredoxin 2540                               | 32,26       |
| 1639571_s_at | FBgn0013276 | Heat shock protein 70Ab; Heat shock protein 70Aa | 20,84       |
| 1626821_s_at | FBgn0013277 | Heat shock protein 70Ba                          | 7,15        |
| 1632841_x_at | FBgn0013278 | Heatshock protein 70Bc; Heat shock protein 70Bb  | 7,15        |
| 1641055_at   | FBgn0001224 | Heat shock protein 23                            | 7,13        |
| 1635044_at   | FBgn0001225 | Heat shock protein 26                            | 6,63        |
| 1635263_at   | FBgn0033519 | Dmel_CG11825                                     | 5,94        |
| 1627613_at   | FBgn0014865 | Metchnikowin                                     | 4,39        |
| 1634366_at   | FBgn0052185 | Dmel_CG32185                                     | 2,94        |
| 1629061_s_at | FBgn0001223 | Heat shock protein 22; Heat shock gene 67Bb      | 2,88        |
| 1640881_at   | FBgn0035343 | Dmel_CG16762                                     | 2,58        |
| 1628117_at   | FBgn0001226 | Heat shock protein 27                            | 2,48        |
| 1640405_at   | FBgn0010497 | lethal (2) 01810                                 | 2,23        |
| 1625265_at   | FBgn0035189 | Dmel_CG9119                                      | 2,19        |
| 1638301_at   | FBgn0034010 | Dmel_CG8157                                      | 2,18        |
| 1634640_at   | FBgn0031693 | Probable cytochrome P450 4ac1                    | 2,05        |

### b. Up-regulated, 24 hpi

| Probeset ID  | Flybase ID  | Gene name                                        | Fold change |
|--------------|-------------|--------------------------------------------------|-------------|
| 1639571_s_at | FBgn0013276 | Heat shock protein 70Ab; Heat shock protein 70Aa | 26,25       |
| 1641055_at   | FBgn0001224 | Heat shock protein 23                            | 15,34       |
| 1635044_at   | FBgn0001225 | Heat shock protein 26                            | 9,91        |
| 1629061_s_at | FBgn0001223 | Heat shock protein 22; Heat shock gene 67Bb      | 6,67        |
| 635666_at    | FBgn0053906 | Histone H2B                                      | 4,47        |
| 1628117_at   | FBgn0001226 | Heat shock protein 27                            | 3,59        |
| 1626821_s_at | FBgn0013277 | Heat shock protein 70Ba                          | 3,33        |
| 1632023_s_at | FBgn0039911 | Dmel_CG1909                                      | 2,85        |
| 1640231_a_at | FBgn0034493 | Dmel_CG8908                                      | 2,81        |
| 1627129_at   | FBgn0000253 | Calmodulin                                       | 2,69        |
| 1629261_at   | FBgn0020660 | Eukaryotic initiation factor 4B                  | 2,43        |
| 1637786_s_at | FBgn0085820 | Dmel_CR41610                                     | 2,35        |
| 1641609_at   | FBgn0005630 | longitudinals lacking                            | 2,30        |
| 1624070_at   | FBgn0010408 | Ribosomal protein S9                             | 2,18        |
| 1641593_at   | FBgn0053969 | Dmel_CG33969                                     | 2,12        |
| 1635210_a_at | FBgn0003137 | Papilin                                          | 2,05        |
| 1631797_at   | FBgn0029521 | Odorant receptor 1a                              | 2,05        |
| 1639005_x_at | FBgn0053272 | Dmel_CG33272                                     | 2,03        |
| 1625387_s_at | FBgn0025615 | Torsin-like protein                              | 2,02        |
| 1627679_at   | FBgn0040371 | Dmel_CG12470                                     | 2,00        |

## Supplementary Figure S2

### a. Down-regulated, 8 hpi

| Probeset ID  | Flybase ID  | Gene name                                  | Fold change |
|--------------|-------------|--------------------------------------------|-------------|
| 1633989_at   | FBgn0037290 | Dmel_CG1124                                | 3,57        |
| 1635227_at   | FBgn0001258 | Ecdysone-inducible gene L3                 | 3,01        |
| 1639737_at   | FBgn0085359 | Dmel_CG34330                               | 2,90        |
| 1635852_at   | FBgn0010194 | Wnt oncogene analog 5                      | 2,76        |
| 1634964_at   | FBgn0038565 | Dmel_CG7794                                | 2,62        |
| 1629479_a_at | FBgn0020303 | fledgling of Klp38B                        | 2,56        |
| 1636275_a_at | FBgn0260964 | Vesicular monoamine transporter            | 2,54        |
| 1624725_at   | FBgn0037565 | Dmel_CG9626                                | 2,54        |
| 1632491_at   | FBgn0052985 | Dmel_CG32985                               | 2,41        |
| 1624591_at   | FBgn0031784 | Dmel_CG9222                                | 2,40        |
| 1635000_at   | FBgn0034603 | Dmel_CG9480                                | 2,22        |
| 1641552_at   | FBgn0010019 | Cytochrome P450-4g1                        | 2,20        |
| 1626442_at   | FBgn0031971 | Dmel_CG7224                                | 2,19        |
| 1628032_a_at | FBgn0051092 | Dmel_CG31092                               | 2,19        |
| 1626849_at   | FBgn0031723 | Dmel_CG7251                                | 2,17        |
| 1637257_at   | FBgn0027601 | Dmel_CG9009                                | 2,17        |
| 1637632_at   | FBgn0031636 | Dmel_CG12194                               | 2,13        |
| 1623949_s_at | FBgn0052816 | Dmel_CG32816                               | 2,09        |
| 1639105_at   | FBgn0065110 | pickpocket 10                              | 2,07        |
| 1637544_s_at | FBgn0085436 | Dmel_CG34407                               | 2,06        |
| 1639537_at   | FBgn0028863 | Dmel_CG4587                                | 2,02        |
| 1625761_a_at | FBgn0035049 | Matrix metalloproteinase 1                 | 2,01        |
| 1631441_s_at | FBgn0035539 | Dmel_CG7447                                | 2,00        |
| 1628494_a_at | FBgn0024315 | Putative inorganic phosphate cotransporter | 2,00        |

### b. Down-regulated, 24 hpi

| Probeset ID  | Flybase ID  | Gene name                       | Fold change |
|--------------|-------------|---------------------------------|-------------|
| 1626442_at   | FBgn0031971 | Dmel_CG7224                     | 4,33        |
| 1626846_s_at | FBgn0031914 | Dmel_CG5973                     | 3,58        |
| 1635227_at   | FBgn0001258 | Ecdysone-inducible gene L3      | 3,29        |
| 1635635_a_at | FBgn0065097 | small non-messenger RNA 357     | 3,27        |
| 1631628_s_at | FBgn0033520 | Peroxiredoxin 2540              | 3,09        |
| 1632719_at   | FBgn0000279 | Cecropin C                      | 2,98        |
| 1629479_a_at | FBgn0020303 | fledgling of Klp38B             | 2,70        |
| 1639737_at   | FBgn0085359 | Dmel_CG34330                    | 2,58        |
| 1623635_at   | FBgn0031701 | Turandot M                      | 2,29        |
| 1630361_at   | FBgn0002945 | naked cuticle                   | 2,26        |
| 1633989_at   | FBgn0037290 | Dmel_CG1124                     | 2,17        |
| 1626892_at   | FBgn0086251 | deadlock                        | 2,16        |
| 1631408_at   | FBgn0029123 | SoxNeuro                        | 2,14        |
| 1624725_at   | FBgn0037565 | Dmel_CG9626                     | 2,13        |
| 1633770_at   | FBgn0037646 | Dmel_CG11967                    | 2,12        |
| 1625840_at   | FBgn0037265 | Uncharacterized protein CG12001 | 2,04        |
| 1635263_at   | FBgn0033519 | Dmel_CG11825                    | 2,03        |
| 1635852_at   | FBgn0010194 | Wnt oncogene analog 5           | 2,02        |
| 1641722_at   | FBgn0016715 | Rhythmically expressed gene 2   | 2,01        |

### c

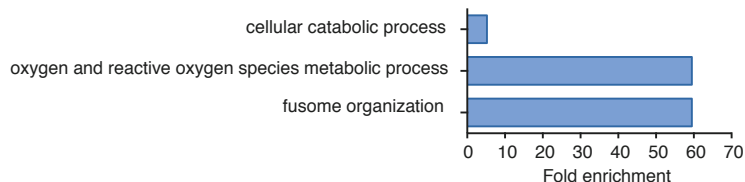

## Supplementary Figure S3

### a. Up-regulated genes, DCV, 24 hpi

| Symbol      | Fold change |
|-------------|-------------|
| TotX        | 32,90       |
| CG11501     | 20,97       |
| TotM        | 13,27       |
| Hsp70Aa     | 9,51        |
| Hsp70Ab     | 9,45        |
| TotC        | 7,52        |
| TotA        | 6,50        |
| Hsp70Bc     | 6,11        |
| Hsp70Bbb    | 5,98        |
| Hsp70Bb     | 5,90        |
| Hsp70Ba     | 5,86        |
| CG11459     | 4,76        |
| Hsp68       | 4,03        |
| CG6639      | 3,71        |
| CG31704     | 2,77        |
| Lsd-1       | 2,68        |
| Lcp65Ag1    | 2,68        |
| Lcp65Ag2    | 2,41        |
| CG42868     | 2,38        |
| Lcp65Ag3    | 2,36        |
| CG1773      | 2,22        |
| Socs36E     | 2,20        |
| ninaD       | 2,19        |
| Cys         | 2,13        |
| CG9616      | 2,13        |
| CG42737     | 2,13        |
| CG14205     | 2,10        |
| lectin-37Da | 2,10        |
| CG6508      | 2,06        |
| CG12517     | 2,03        |
| PGRP-SC1a   | 2,00        |

### b. Down-regulated genes, DCV, 24 hpi

| Symbol   | Fold change |
|----------|-------------|
| Lsp1beta | 6,63        |
| Lsp2     | 4,89        |
| Obp99a   | 4,06        |
| Cht4     | 3,73        |
| Fst      | 3,34        |
| GstD2    | 2,73        |
| CG16704  | 2,33        |
| Dro      | 2,31        |
| Vml      | 2,28        |
| Vm32E    | 2,23        |
| CG10621  | 2,23        |
| CG34291  | 2,23        |
| ndl      | 2,08        |
| psd      | 2,01        |

### c. Gene Ontology

#### Down-regulated genes, DCV, 24 hpi

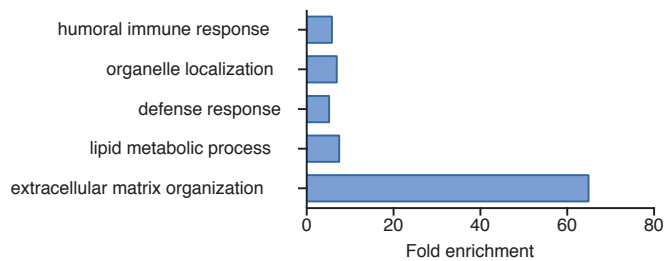

## Supplementary Figure S4

### a. Up-regulated genes, CrPV, 24 hpi

| Symbol       | Fold change |
|--------------|-------------|
| CG11501      | 59,30       |
| TotX         | 58,08       |
| lectin-24A   | 38,32       |
| TotM         | 30,70       |
| Dpt          | 13,55       |
| AttC         | 12,91       |
| CG32185      | 12,82       |
| TotC         | 12,73       |
| DptB         | 12,47       |
| TotA         | 11,96       |
| CG10332/IM18 | 10,85       |
| CG11459      | 10,56       |
| CecA1        | 9,32        |
| AttA         | 9,25        |
| AttB         | 9,00        |
| CG33926      | 5,90        |
| PGRP-SB1     | 5,86        |
| Mtk          | 4,79        |
| CG14527      | 4,41        |
| Cys          | 4,00        |
| CG14205      | 3,71        |
| CG14526      | 3,68        |
| Dro          | 3,53        |
| Obp56a       | 3,43        |
| CG1773       | 3,29        |
| PGRP-SD      | 3,25        |
| CG3106       | 3,03        |
| CG5246       | 2,97        |
| Cyp4d1       | 2,83        |
| CG31704      | 2,79        |
| Jon66Cii     | 2,69        |
| CG4259       | 2,68        |
| CG42737      | 2,57        |
| CG9676       | 2,53        |
| CG9377       | 2,48        |
| betaTub85D   | 2,45        |
| CG30431      | 2,43        |
| LysS         | 2,43        |
| CG7829       | 2,43        |
| CG6495       | 2,39        |
| CG8329       | 2,39        |
| Npc2d        | 2,38        |
| Rfabg        | 2,36        |
| CG13936      | 2,36        |
| PGRP-SC1a    | 2,35        |
| CG3239       | 2,35        |
| CG14225      | 2,31        |
| CG14872      | 2,30        |
| PGRP-SC1b    | 2,22        |
| CG31041      | 2,20        |
| CG2772       | 2,17        |
| CG16836      | 2,16        |
| CG11911      | 2,16        |
| CG32523      | 2,14        |
| ap           | 2,14        |
| Hml          | 2,13        |
| CG2736       | 2,13        |
| tim          | 2,11        |
| CG5618       | 2,10        |
| CG12057      | 2,10        |
| CG11912      | 2,10        |
| GstD5        | 2,08        |
| Jon66Ci      | 2,08        |
| Tequila      | 2,08        |
| CG11852      | 2,07        |
| CG6361       | 2,06        |
| CG6295       | 2,06        |
| CG32368      | 2,04        |
| CG42868      | 2,03        |
| sug          | 2,00        |
| CG17032      | 2,00        |

### b. Down-regulated genes, CrPV, 24 hpi

| Symbol       | Fold change |
|--------------|-------------|
| CG7203       | 14,52       |
| fln          | 8,28        |
| TpnC4        | 7,73        |
| Nplp3        | 6,54        |
| Cht4         | 6,02        |
| Fst          | 5,86        |
| Cpr49Ae      | 4,50        |
| CG9090       | 4,38        |
| CG14246      | 3,97        |
| CG3264       | 3,78        |
| CG15434      | 3,73        |
| Lsp2         | 3,71        |
| CG34172      | 3,58        |
| Mur11Da      | 3,53        |
| CG4066       | 3,46        |
| CG15571      | 3,41        |
| CG14245      | 3,34        |
| TpnC41C      | 3,29        |
| CG31926      | 3,23        |
| CG16772      | 3,18        |
| CG7409       | 3,12        |
| Cp19         | 3,12        |
| CG15065      | 3,10        |
| CG16704      | 3,03        |
| CG13084      | 3,03        |
| Femcoat      | 2,89        |
| CG13083      | 2,83        |
| Act79B       | 2,77        |
| CG12716      | 2,75        |
| CG9297       | 2,73        |
| Cp7Fa        | 2,73        |
| CG2022       | 2,62        |
| CG4757       | 2,58        |
| proPO-A1     | 2,58        |
| Mlc1         | 2,55        |
| Cp16         | 2,50        |
| CG11425      | 2,48        |
| Spn31A       | 2,46        |
| CG31205      | 2,45        |
| Mlc2         | 2,45        |
| Fhos         | 2,39        |
| CR31084      | 2,31        |
| Cpr72Ec      | 2,30        |
| Act88F       | 2,28        |
| Cpr62Bb      | 2,28        |
| CG13113      | 2,27        |
| CG4000       | 2,25        |
| CG31928      | 2,20        |
| Npc2e        | 2,20        |
| CG15528      | 2,19        |
| Gasp         | 2,17        |
| Ugt35b       | 2,16        |
| wupA         | 2,16        |
| CG34291      | 2,16        |
| CG16978      | 2,13        |
| CG34365      | 2,11        |
| retinin      | 2,10        |
| CG8193       | 2,10        |
| Spn43Aa      | 2,08        |
| CG31904      | 2,07        |
| Prm          | 2,04        |
| Pkcdelta     | 2,04        |
| CG33521      | 2,03        |
| nAcRbeta-64B | 2,00        |

### c. Gene Ontology Down-regulated genes, CrPV, 24 hpi

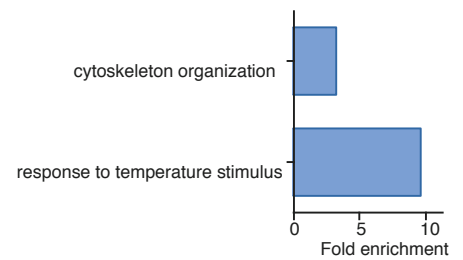

Supplementary Figure S5

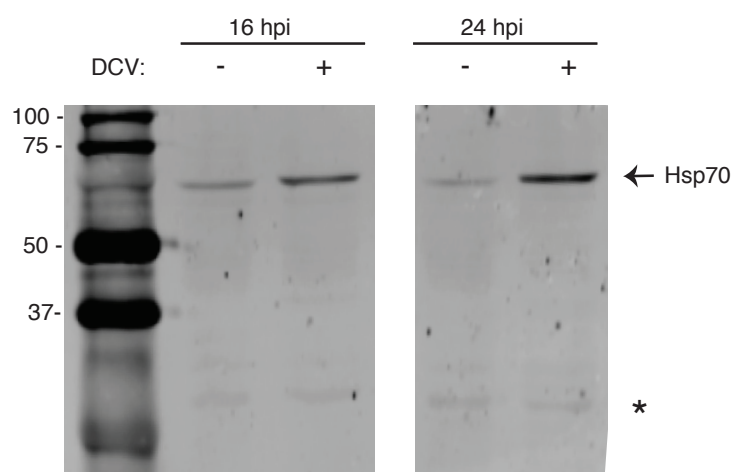

# Supplementary Figure S6

a

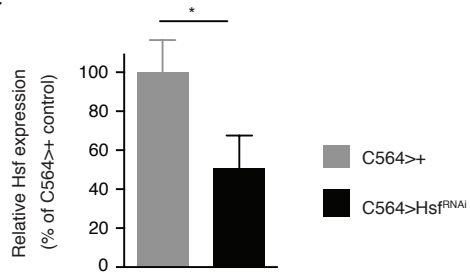

b

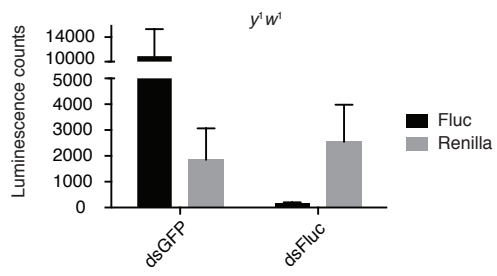

c

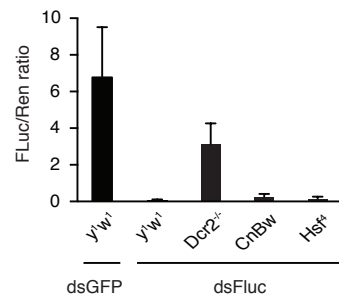

**Supplementary Table S1. Primer list.**

| Target       | Primer sequence (5'-3') |
|--------------|-------------------------|
| Rp49         | ATGACCATCCGCCCAGCATAC   |
|              | CTGCATGAGCAGGACCTCCA    |
| Hsp70        | CACGATGTCGTGGATCTGAC    |
|              | GGGCCAAGACTTCTACACCA    |
| Hsp23        | TGCCCTTCTATGAGCCCTAC    |
|              | TCCTTTCCGATTTTCGACAC    |
| Hsp26        | TAGCCATCGGGAACCTTGTA    |
|              | GTGGACGACTCCATCTTGGT    |
| Hsp27        | GACTGGGTCGTCGTCGTTAT    |
|              | ACACCTGGAAGCCATCTTTG    |
| Hsf          | GCGATTGACTCACACTTTGG    |
|              | TGAGCATTAGCTCGCACAAC    |
| DCV          | TTGCCATTGCACCACTAAAA    |
|              | AAAATTTGTTTTAGCCCAGAA   |
| vir-1        | ATTACTCCGAATTCGAAGCTTCC |
|              | CGAATTCTTCACGCTCCTTC    |
| TotA         | CCCTGAGGAACGGGAGAGTA    |
|              | CTTTCCAACGATCCTCGCCT    |
| TotM         | ACCGGAACATCGACAGCC      |
|              | CCAGAATCCGCCTTGTGC      |
| Vago         | CAGCCAAGCGATTTCCTTATC   |
|              | CTCATACAGTGGGCAGCATC    |
| Drosomyein   | GTACTIONGTTGCGCCCTCTTCG |
|              | ACAGGTCTCGTTGTCCCAGA    |
| Metchnikowin | TACATCAGTGCTGGCAGAGC    |
|              | AATAAATTGGACCCGGTCTTG   |
| Diptericin   | TGTGAATCTGCAGCCTGAAC    |
|              | GCTCAGATCGAATCCTTGCT    |

Given the high sequence identity amongst members of the Hsp70 genes family, Hsp70 primers detect multiple Hsp70 genes (Hsp70Aa, Hsp70Ab, Hsp70Ba, Hsp70Bb, Hsp70Bc).
